# Supplementary material for: Tryptophan metabolism is inversely regulated in the tumor and blood of patients with glioblastoma
Source: PubMed Central journal article supplement (PMC8490504; doi:10.7150/thno.60679), 2021-09-03
Supplement: thnov11p9217s1.pdf [file thnov11p9217s1.pdf]

1 **Supplementary Material**

2  
3 **Tryptophan metabolism is inversely regulated in the tumor and blood**  
4 **of patients with glioblastoma**

5  
6 Verena Panitz<sup>1,2,\*</sup>, Saša Končarević<sup>3,\*</sup>, Ahmed Sadik<sup>1,4,\*</sup>, Dennis Friedel<sup>1,4</sup>, Tobias Bausbacher<sup>5</sup>, Saskia  
7 Trump<sup>6</sup>, Vadim Farztdinov<sup>3,\*\*</sup>, Sandra Schulz<sup>5</sup>, Philipp Sievers<sup>7,8</sup>, Stefan Schmidt<sup>5</sup>, Ina Jürgenson<sup>1,2</sup>,  
8 Stephan Jung<sup>3</sup>, Karsten Kuhn<sup>3</sup>, Irada Pflüger<sup>9</sup>, Suraj Sharma<sup>10</sup>, Antje Wick<sup>2</sup>, Pauline Pfänder<sup>1,4</sup>, Stefan  
9 Selzer<sup>3</sup>, Philipp Vollmuth<sup>9</sup>, Felix Sahn<sup>7,8</sup>, Andreas von Deimling<sup>7,8</sup>, Ines Heiland<sup>10</sup>, Carsten Hopf<sup>5</sup>, Peter  
10 Schulz-Knappe<sup>3,\*\*\*</sup>, Ian Pike<sup>11</sup>, Michael Platten<sup>12,13</sup>, Wolfgang Wick<sup>2,14</sup>, Christiane A. Opitz<sup>1,2,§</sup>

11  
12 <sup>1</sup>DKTK Brain Cancer Metabolism Group, German Cancer Research Center (DKFZ), 69120 Heidelberg,  
13 Germany.

14 <sup>2</sup>Department of Neurology and National Center for Tumor Diseases, Heidelberg University Hospital, 69120  
15 Heidelberg, Germany.

16 <sup>3</sup>Proteome Sciences R&D GmbH & Co. KG, Altenhöferallee 3, 60438 Frankfurt/Main, Germany.

17 <sup>4</sup>Faculty of Bioscience, Heidelberg University, 69120 Heidelberg, Germany.

18 <sup>5</sup>Center for Mass Spectrometry and Optical Spectroscopy (CeMOS), Mannheim University of Applied  
19 Sciences, 68163 Mannheim, Germany.

20 <sup>6</sup>Molecular Epidemiology Unit, Berlin Institute of Health at Charité - Universitätsmedizin Berlin, 10117  
21 Berlin, Germany.

22 <sup>7</sup>Department of Neuropathology, Institute of Pathology, Heidelberg University Hospital, 69120 Heidelberg,  
23 Germany.

24 <sup>8</sup>Clinical Cooperation Unit Neuropathology, German Consortium for Translational Cancer Research  
25 (DKTK), German Cancer Research Center (DKFZ), 69120 Heidelberg, Germany.

26 <sup>9</sup>Department of Neuroradiology, Heidelberg University Hospital, 69120 Heidelberg, Germany.

27 <sup>10</sup>Department of Arctic and Marine Biology, UiT, The Arctic University of Norway, 9037 Tromsø, Norway.

28 <sup>11</sup>Proteome Sciences plc, 5 Dashwood Lang Road, Bourne Business Park, Addlestone, Surrey KT15 2HJ,  
29 United Kingdom.

30 <sup>12</sup>Department of Neurology, Medical Faculty Mannheim, University of Heidelberg, 68167 Mannheim,  
31 Germany.

32 <sup>13</sup>DKTK Clinical Cooperation Unit Neuroimmunology and Brain Tumor Immunology, German Cancer  
33 Research Center (DKFZ), 69120 Heidelberg, Germany.

34 <sup>14</sup>Clinical Cooperation Unit Neurooncology, German Cancer Research Center (DKFZ), 69120 Heidelberg,  
35 Germany.

36

37 \*These authors contributed equally

38 §Corresponding author: [c.opitz@dkfz.de](mailto:c.opitz@dkfz.de)

39

40 \*\*Current address: Core Facility - High-Throughput Mass Spectrometry, Charité - Universitätsmedizin  
41 Berlin, corporate member of Freie Universität Berlin, Humboldt-Universität zu Berlin and Berlin Institute  
42 of Health (BIH), 10117 Berlin, Germany.

43 \*\*\*Current address: Mittelorbwoich 125, 47839 Krefeld, Germany.

44

Figure S1

A

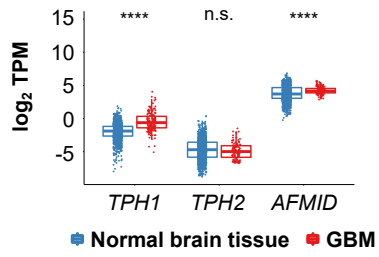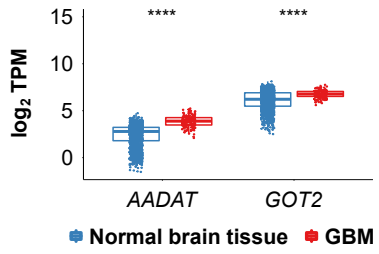

B

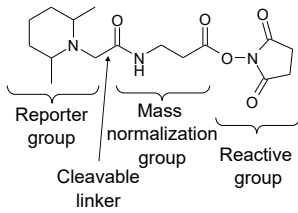

45 **Figure S1. Trp metabolism-associated genes are upregulated in glioblastoma, related to Figures 1 and**  
46 **2.**

47 **(A)** Boxplot representation of the expression of select Trp metabolism-associated enzymes in normal brain  
48 tissue (blue) (GTEx data) and in glioblastoma (GBM) tissue (red) (TCGA data) represented as log<sub>2</sub>  
49 transcripts per million (log<sub>2</sub> TPM) (Wilcoxon rank-sum test, \*\*\*\*  $P < 0.0001$ , n.s. not significant). CCBL1  
50 (KAT I) and CCBL2 (KAT III) were not expressed in the TCGA data.

51 **(B)** Chemical structure of TMT<sup>®</sup> reagents.

52 Abbreviations: AADAT: alpha-aminoadipate aminotransferase; AFMID: arylformamidase; CCBL: cysteine  
53 conjugate beta lyase; GBM: glioblastoma; GOT2: glutamate oxaloacetate transaminase 2; GTEx: Genotype-  
54 Tissue Expression; KAT: kynurenine aminotransferase; TCGA: The Cancer Genome Atlas; TMT<sup>®</sup>: tandem  
55 mass tag; TPH1/2: tryptophan hydroxylase 1/2; TPM: transcripts per million; Trp: tryptophan.

**Figure S2**

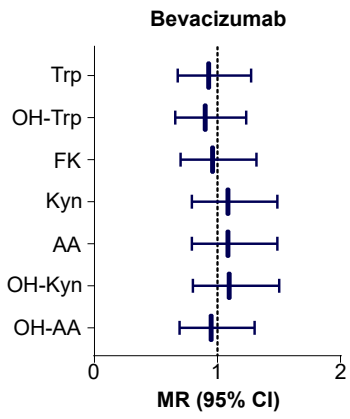

56 **Figure S2. Bevacizumab treatment does not influence metabolite levels in peripheral blood of patients,**  
57 **related to Figure 3.**

58 Forest plot depicting the association of metabolite levels in peripheral blood of patients ( $n = 42$ ) with the  
59 cumulative dose of bevacizumab received prior to blood draw. Mean ratio (MR) and 95% confidence  
60 intervals (CI) are shown.

61 See also Table S11.

62 Abbreviations: AA: anthranilic acid; CI: confidence interval; FK: *N*-formylkynurenine; Kyn: kynurenine;  
63 MR: mean ratio; OH-AA: hydroxy-anthranilic acid; OH-Kyn: hydroxy-kynurenine; OH-Trp: hydroxy-  
64 tryptophan; Trp: tryptophan.

Figure S3

A

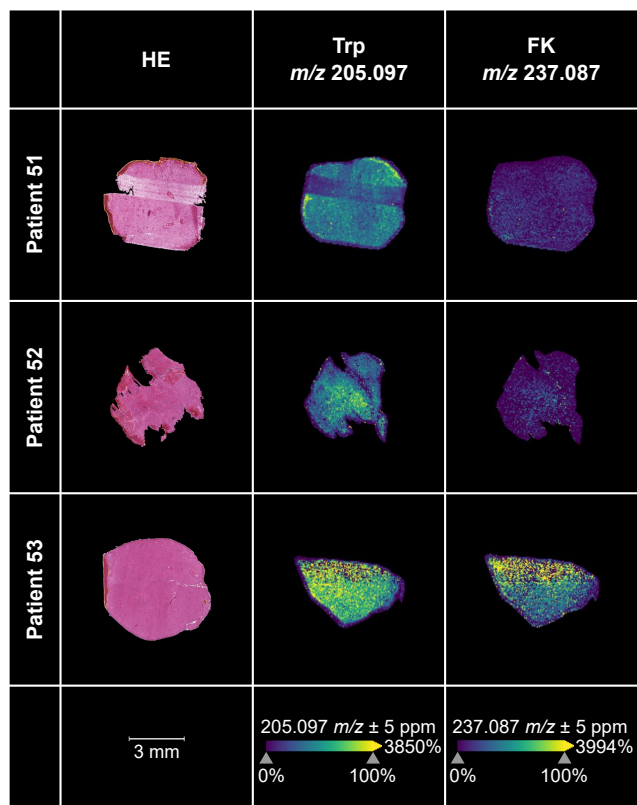

B

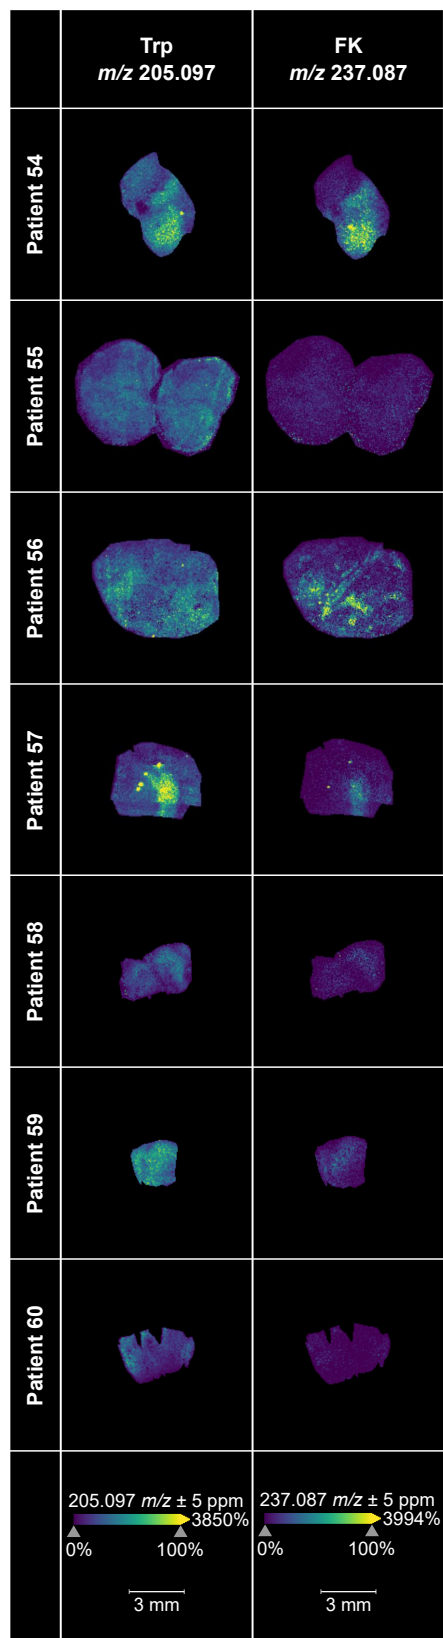

65 **Figure S3. Trp and its metabolite FK in glioblastoma tumor tissue, related to Figure 5.**

66 **(A)** MALDI MSI of Trp and FK distribution in human glioblastoma samples (middle and right column) and  
67 corresponding annotated HE-stained adjacent tissue sections (left column) ( $n = 3$ ). Displayed are Trp-D5  
68 normalized ion density maps of Trp ( $m/z$  205.097) and FK ( $m/z$  237.087). Trp and FK were measured using  
69 a FT-ICR MS in positive ion mode at a raster size of 50  $\mu\text{m}$ . Slides shown contain preparation artefacts.  
70 Annotations of HE-stainings: black: necrosis; red: highly vascularized tumor tissue or blood; yellow:  
71 artefacts.

72 **(B)** MALDI MSI of Trp and FK distribution in human glioblastoma samples ( $n = 7$ ). Displayed are Trp-D5  
73 normalized ion density maps of Trp ( $m/z$  205.097) and FK ( $m/z$  237.087). Trp and FK were measured using  
74 a FT-ICR MS in positive ion mode at a raster size of 50  $\mu\text{m}$ . Samples without available adjacent HE-stained  
75 slide are shown.

76 See also Table S16.

77 Abbreviations: FK: *N*-formylkynurenine; FT-ICR MS: Fourier-transform ion cyclotron resonance mass  
78 spectrometer; HE: hematoxylin-and-eosin; MSI: mass spectrometry imaging; Trp: tryptophan; Trp-D5:  
79 deuterated tryptophan.



Figure S4

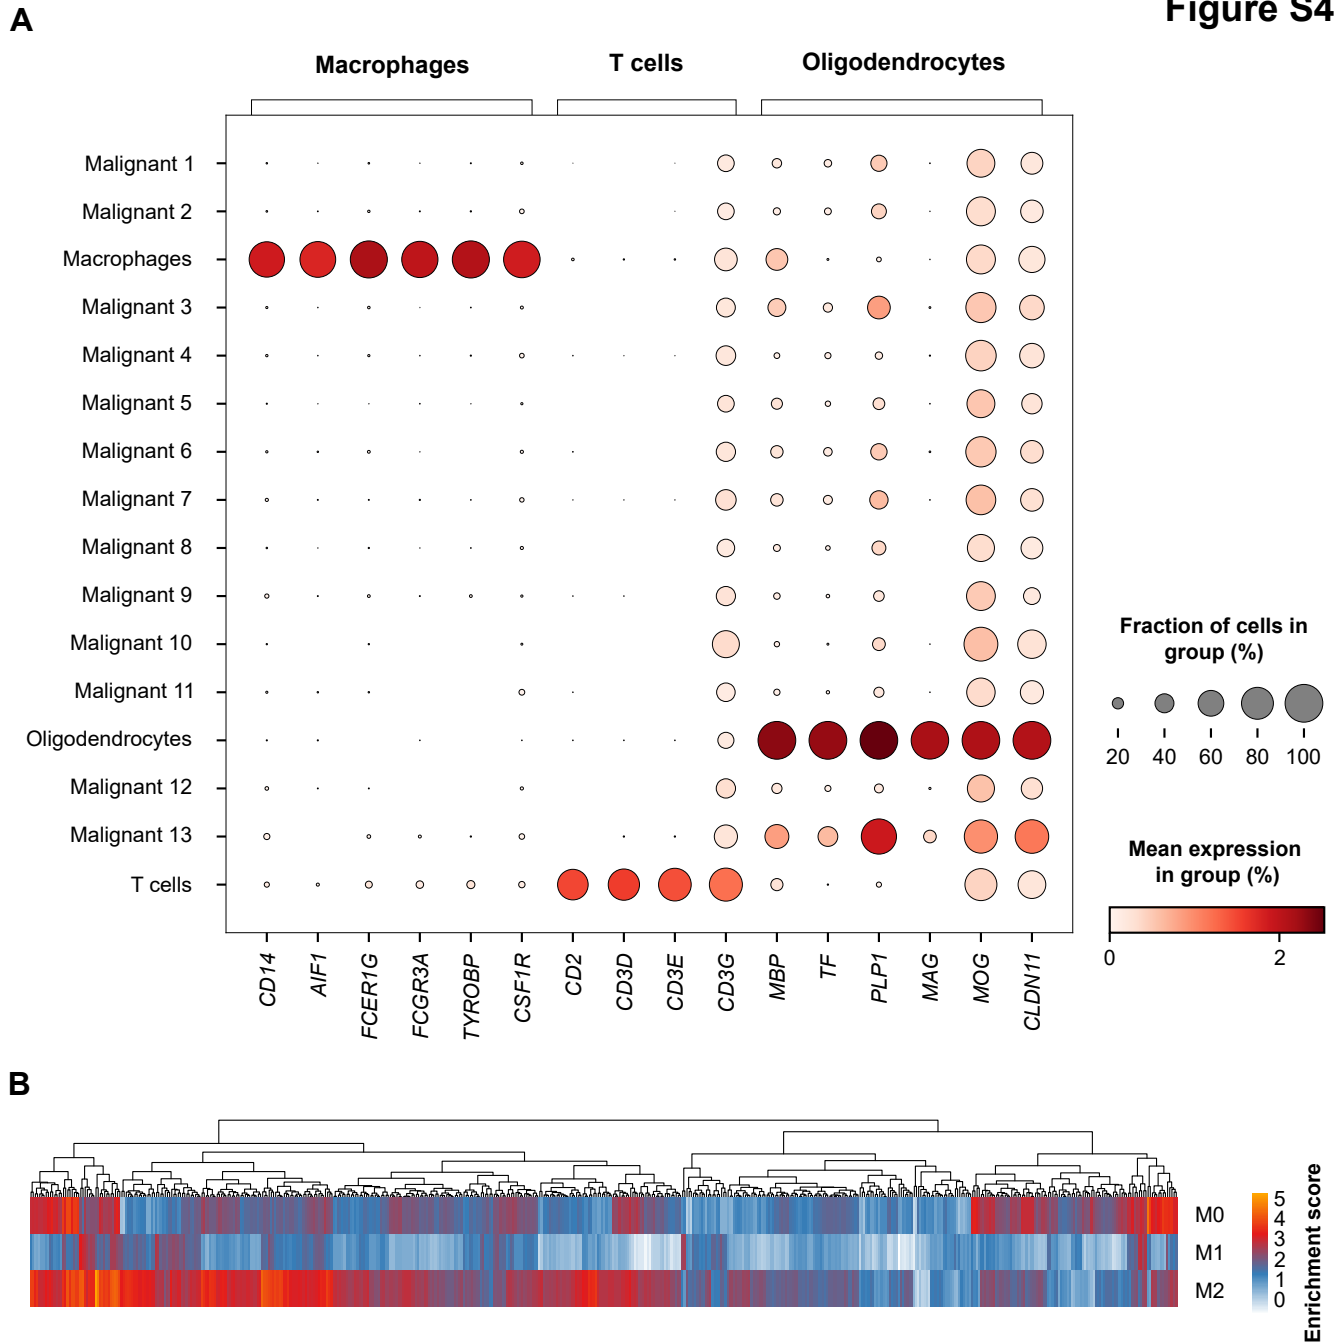

80 **Figure S4. Expression of marker genes used to characterize the non-malignant cell populations,**  
81 **related to Figure 6.**

82 **(A)** Bubble plot heatmap showing the mean expression of the select marker genes [7] used to characterize  
83 the non-malignant Louvain cell clusters of the scRNA-seq dataset (GSE131928). The red color intensity is  
84 directly proportional to the expression level of a marker gene in a specific cell population. The size of the  
85 circle denotes the fraction of cells expressing the marker gene.

86 **(B)** Heatmap showing the BPA scores of the macrophage signatures of the subsets M0, M1 and M2 in the  
87 scRNA-seq dataset (GSE131928).

88 Abbreviation: BPA: biological process activity; scRNA-seq: single cell RNA-sequencing.

89 **Table S1. Transition parameters for Trp, related to Material and Methods.**

90 Transition parameters used to measure Trp. The ion masses of parent and products after fragmentation are  
 91 given, together with their respective collision energy (CE) values and the S-lens radio frequency levels. For  
 92 each metabolite the six TMT<sup>®</sup> reporter ions and a metabolite specific fragment were monitored.

| Analyte                                                                                   | Parent | Product | CE | S-lens |
|-------------------------------------------------------------------------------------------|--------|---------|----|--------|
| TMT <sup>®</sup> 126                                                                      | 434.26 | 126.13  | 29 | 172    |
| TMT <sup>®</sup> 127                                                                      | 434.26 | 127.13  | 29 | 172    |
| TMT <sup>®</sup> 128                                                                      | 434.26 | 128.13  | 29 | 172    |
| TMT <sup>®</sup> 129                                                                      | 434.26 | 129.14  | 29 | 172    |
| TMT <sup>®</sup> 130                                                                      | 434.26 | 130.14  | 29 | 172    |
| TMT <sup>®</sup> 131                                                                      | 434.26 | 131.14  | 29 | 172    |
| Fragment 188                                                                              | 434.26 | 188.07  | 28 | 172    |
| Abbreviations: CE: collision energy; TMT <sup>®</sup> : tandem mass tag; Trp: tryptophan. |        |         |    |        |

93

94 **Table S2. Transition parameters for Kyn, related to Material and Methods.**

95 Transition parameters used to measure Kyn. The ion masses of parent and products after fragmentation are  
 96 given, together with their respective collision energy (CE) values and the S-lens radio frequency levels. For  
 97 each metabolite the six TMT<sup>®</sup> reporter ions and a metabolite specific fragment were monitored.

| Analyte              | Parent | Product | CE | S-lens |
|----------------------|--------|---------|----|--------|
| TMT <sup>®</sup> 126 | 438.25 | 126.13  | 35 | 173    |
| TMT <sup>®</sup> 127 | 438.25 | 127.13  | 35 | 173    |
| TMT <sup>®</sup> 128 | 438.25 | 128.13  | 35 | 173    |
| TMT <sup>®</sup> 129 | 438.25 | 129.14  | 35 | 173    |
| TMT <sup>®</sup> 130 | 438.25 | 130.14  | 35 | 173    |
| TMT <sup>®</sup> 131 | 438.25 | 131.14  | 35 | 173    |

|                                                                                           |        |        |    |     |
|-------------------------------------------------------------------------------------------|--------|--------|----|-----|
| Fragment 146                                                                              | 438.25 | 146.06 | 28 | 173 |
| Abbreviations: CE: collision energy; Kyn: kynurenine; TMT <sup>®</sup> : tandem mass tag. |        |        |    |     |

98

99 **Table S3. Transition parameters for FK, related to Material and Methods.**

100 Transition parameters used to measure FK. The ion masses of parent and products after fragmentation are  
 101 given, together with their respective collision energy (CE) values and the S-lens radio frequency levels. For  
 102 each metabolite the six TMT<sup>®</sup> reporter ions and a metabolite specific fragment were monitored.

| Analyte                                                                                              | Parent | Product | CE | S-lens |
|------------------------------------------------------------------------------------------------------|--------|---------|----|--------|
| TMT <sup>®</sup> 126                                                                                 | 466.25 | 126.13  | 30 | 150    |
| TMT <sup>®</sup> 127                                                                                 | 466.25 | 127.13  | 30 | 150    |
| TMT <sup>®</sup> 128                                                                                 | 466.25 | 128.13  | 30 | 150    |
| TMT <sup>®</sup> 129                                                                                 | 466.25 | 129.14  | 30 | 150    |
| TMT <sup>®</sup> 130                                                                                 | 466.25 | 130.14  | 30 | 150    |
| TMT <sup>®</sup> 131                                                                                 | 466.25 | 131.14  | 30 | 150    |
| Fragment 174                                                                                         | 466.25 | 174.05  | 30 | 150    |
| Abbreviations: CE: collision energy; <i>N</i> -formylkynurenine; TMT <sup>®</sup> : tandem mass tag. |        |         |    |        |

103

104 **Table S4. Transition parameters for OH-Trp, related to Material and Methods.**

105 Transition parameters used to measure OH-Trp. The ion masses of parent and products after fragmentation  
 106 are given, together with their respective collision energy (CE) values and the S-lens radio frequency levels.  
 107 For each metabolite the six TMT<sup>®</sup> reporter ions and a metabolite specific fragment were monitored.

| Analyte              | Parent | Product | CE | S-lens |
|----------------------|--------|---------|----|--------|
| TMT <sup>®</sup> 126 | 450.25 | 126.13  | 30 | 150    |
| TMT <sup>®</sup> 127 | 450.25 | 127.13  | 30 | 150    |
| TMT <sup>®</sup> 128 | 450.25 | 128.13  | 30 | 150    |

|                                                                                                      |        |        |    |     |
|------------------------------------------------------------------------------------------------------|--------|--------|----|-----|
| TMT <sup>®</sup> 129                                                                                 | 450.25 | 129.14 | 30 | 150 |
| TMT <sup>®</sup> 130                                                                                 | 450.25 | 130.14 | 30 | 150 |
| TMT <sup>®</sup> 131                                                                                 | 450.25 | 131.14 | 30 | 150 |
| Fragment 175                                                                                         | 450.25 | 175.08 | 30 | 150 |
| Abbreviations: CE: collision energy; OH-Trp: hydroxy-tryptophan; TMT <sup>®</sup> : tandem mass tag. |        |        |    |     |

108

109 **Table S5. Transition parameters for OH-Kyn, related to Material and Methods.**

110 Transition parameters used to measure OH-Kyn. The ion masses of parent and products after fragmentation

111 are given, together with their respective collision energy (CE) values and the S-lens radio frequency levels.

112 For each metabolite the six TMT<sup>®</sup> reporter ions and a metabolite specific fragment were monitored.

| Analyte                                                                                              | Parent | Product | CE | S-lens |
|------------------------------------------------------------------------------------------------------|--------|---------|----|--------|
| TMT <sup>®</sup> 126                                                                                 | 342.21 | 126.13  | 35 | 133    |
| TMT <sup>®</sup> 127                                                                                 | 342.21 | 127.13  | 35 | 133    |
| TMT <sup>®</sup> 128                                                                                 | 342.21 | 128.13  | 35 | 133    |
| TMT <sup>®</sup> 129                                                                                 | 342.21 | 129.14  | 35 | 133    |
| TMT <sup>®</sup> 130                                                                                 | 342.21 | 130.14  | 35 | 133    |
| TMT <sup>®</sup> 131                                                                                 | 342.21 | 131.14  | 35 | 133    |
| Fragment 190                                                                                         | 342.21 | 190.05  | 25 | 133    |
| Abbreviations: CE: collision energy; OH-Kyn: hydroxy-kynurenine; TMT <sup>®</sup> : tandem mass tag. |        |         |    |        |

113

114 **Table S6. Transition parameters for AA, related to Material and Methods.**

115 Transition parameters used to measure AA. The ion masses of parent and products after fragmentation are

116 given, together with their respective collision energy (CE) values and the S-lens radio frequency levels. For

117 each metabolite the six TMT<sup>®</sup> reporter ions and a metabolite specific fragment were monitored.

| Analyte | Parent | Product | CE | S-lens |
|---------|--------|---------|----|--------|
|---------|--------|---------|----|--------|

|                                                                                                |        |        |    |     |
|------------------------------------------------------------------------------------------------|--------|--------|----|-----|
| TMT <sup>®</sup> 126                                                                           | 367.22 | 126.13 | 26 | 138 |
| TMT <sup>®</sup> 127                                                                           | 367.22 | 127.13 | 26 | 138 |
| TMT <sup>®</sup> 128                                                                           | 367.22 | 128.13 | 26 | 138 |
| TMT <sup>®</sup> 129                                                                           | 367.22 | 129.14 | 26 | 138 |
| TMT <sup>®</sup> 130                                                                           | 367.22 | 130.14 | 26 | 138 |
| TMT <sup>®</sup> 131                                                                           | 367.22 | 131.14 | 26 | 138 |
| Fragment 120                                                                                   | 367.22 | 120.04 | 32 | 138 |
| Abbreviations: AA: anthranilic acid; CE: collision energy; TMT <sup>®</sup> : tandem mass tag. |        |        |    |     |

118

119 **Table S7. Transition parameters for OH-AA, related to Material and Methods.**

120 Transition parameters used to measure OH-AA. The ion masses of parent and products after fragmentation  
 121 are given, together with their respective collision energy (CE) values and the S-lens radio frequency levels.

122 For each metabolite the six TMT<sup>®</sup> reporter ions and a metabolite specific fragment were monitored.

| Analyte                                                                                                   | Parent | Product | CE | S-lens |
|-----------------------------------------------------------------------------------------------------------|--------|---------|----|--------|
| TMT <sup>®</sup> 126                                                                                      | 383.21 | 126.13  | 26 | 142    |
| TMT <sup>®</sup> 127                                                                                      | 383.21 | 127.13  | 26 | 142    |
| TMT <sup>®</sup> 128                                                                                      | 383.21 | 128.13  | 26 | 142    |
| TMT <sup>®</sup> 129                                                                                      | 383.21 | 129.14  | 26 | 142    |
| TMT <sup>®</sup> 130                                                                                      | 383.21 | 130.14  | 26 | 142    |
| TMT <sup>®</sup> 131                                                                                      | 383.21 | 131.14  | 26 | 142    |
| Fragment 136                                                                                              | 383.21 | 136.04  | 27 | 142    |
| Abbreviations: CE: collision energy; OH-AA: hydroxy-anthranilic acid; TMT <sup>®</sup> : tandem mass tag. |        |         |    |        |

123

124 **Table S8. CV values of the MS/MS measurements of Trp and its metabolites, related to Material and**  
125 **Methods.**

126 Representation of the mean coefficient of variation (CV) values and their SD (SD (CV)) for the different  
127 metabolites in the MS/MS measurements.

| <b>Metabolite</b> | <b>CV mean [%]</b> | <b>SD (CV) [%]</b> |
|-------------------|--------------------|--------------------|
| Trp               | 2.7                | 1.6                |
| OH-Trp            | 2.4                | 2.0                |
| FK                | 1.8                | 1.6                |
| Kyn               | 2.4                | 1.6                |
| AA                | 2.9                | 3.5                |
| OH-Kyn            | 3.8                | 3.6                |
| OH-AA             | 5.8                | 4.4                |

Abbreviations: AA: anthranilic acid; CV: coefficient of variation; FK: *N*-formylkynurenine; Kyn: kynurenine; MS/MS: tandem mass spectrometry; OH-AA: hydroxy-anthranilic acid; OH-Kyn: hydroxy-kynurenine; OH-Trp: hydroxy-tryptophan; SD: standard deviation; Trp: tryptophan.

128

129 **Table S9. Overview of the characteristics of the study cohort for serum metabolite measurements,**  
 130 **related to Figure 3.**

|                                                                                  | <b>Patients</b>       | <b>Controls</b> |
|----------------------------------------------------------------------------------|-----------------------|-----------------|
| <b><i>n</i></b>                                                                  | 43                    | 43              |
| <b>Median age in years</b>                                                       | 54.11                 | 54.34           |
| <b>Sex</b>                                                                       | F: 19<br>M: 24        | F: 19<br>M: 24  |
| <b>IDH status</b>                                                                | WT: 33<br>Unknown: 10 |                 |
| <b>Prior bevacizumab treatment</b>                                               | yes: 29<br>no: 14     |                 |
| Abbreviations: F: female; IDH: isocitrate dehydrogenase; M: male; WT: wild type. |                       |                 |

131



132 **Table S10. Detailed patient characteristics of the study cohort for serum metabolite measurements,**  
133 **related to Figure 3.**

| Patient number | MGMT promotor status | EGFR amplification | Evidence for PTEN loss | Timespan x between last surgery and blood draw [years] | Previous RT and TMZ treatment | Previous second line therapy with nitrosourea | Previous ICB | Bevacizumab treatment before blood draw |
|----------------|----------------------|--------------------|------------------------|--------------------------------------------------------|-------------------------------|-----------------------------------------------|--------------|-----------------------------------------|
| 1              | n.a.                 | n.a.               | n.a.                   | $1.0 < x \leq 1.5$                                     | yes                           | no                                            | no           | yes                                     |
| 2              | methylated           | n.a.               | n.a.                   | $1.5 < x \leq 2.5$                                     | yes                           | yes                                           | yes          | yes                                     |
| 3              | n.a.                 | n.a.               | n.a.                   | $2.5 < x \leq 6.5$                                     | yes                           | no                                            | yes          | no                                      |
| 4              | n.a.                 | n.a.               | n.a.                   | $1.5 < x \leq 2.5$                                     | yes                           | yes                                           | no           | yes                                     |
| 5              | unmethylated         | not amplified      | yes                    | $0.5 < x \leq 1.0$                                     | yes                           | no                                            | no           | yes                                     |
| 6              | n.a.                 | n.a.               | n.a.                   | $1.5 < x \leq 2.5$                                     | yes                           | yes                                           | no           | yes                                     |
| 7              | n.a.                 | n.a.               | n.a.                   | $2.5 < x \leq 6.5$                                     | yes                           | yes                                           | no           | yes                                     |
| 8              | unmethylated         | amplified          | no                     | $0.5 < x \leq 1.0$                                     | yes                           | yes                                           | yes          | yes                                     |
| 9              | n.a.                 | n.a.               | no                     | $1.0 < x \leq 1.5$                                     | yes                           | no                                            | no           | yes                                     |
| 10             | methylated           | n.a.               | n.a.                   | $2.5 < x \leq 6.5$                                     | yes                           | no                                            | no           | yes                                     |
| 11             | methylated           | not amplified      | n.a.                   | $0.5 < x \leq 1.0$                                     | yes                           | no                                            | no           | yes                                     |
| 12             | unmethylated         | not amplified      | yes                    | $1.0 < x \leq 1.5$                                     | yes                           | yes                                           | no           | yes                                     |
| 13             | n.a.                 | n.a.               | n.a.                   | $1.0 < x \leq 1.5$                                     | yes                           | no                                            | no           | yes                                     |
| 14             | unmethylated         | n.a.               | n.a.                   | $2.5 < x \leq 6.5$                                     | yes                           | no                                            | no           | yes                                     |
| 15             | n.a.                 | n.a.               | n.a.                   | $1.5 < x \leq 2.5$                                     | yes                           | yes                                           | no           | yes                                     |
| 16             | unmethylated         | not amplified      | yes                    | $0.5 < x \leq 1.0$                                     | yes                           | yes                                           | no           | yes                                     |
| 17             | unmethylated         | amplified          | yes                    | $1.0 < x \leq 1.5$                                     | yes                           | yes                                           | no           | yes                                     |
| 18             | unmethylated         | not amplified      | n.a.                   | $0.5 < x \leq 1.0$                                     | yes                           | no                                            | no           | yes                                     |
| 19             | methylated           | amplified          | no                     | $1.0 < x \leq 1.5$                                     | yes                           | yes                                           | no           | no                                      |
| 20             | unmethylated         | not amplified      | n.a.                   | $1.0 < x \leq 1.5$                                     | yes                           | no                                            | no           | no                                      |

|    |              |               |      |                    |         |     |    |     |
|----|--------------|---------------|------|--------------------|---------|-----|----|-----|
| 21 | unmethylated | n.a.          | n.a. | $0.5 < x \leq 1.0$ | yes     | yes | no | no  |
| 22 | methylated   | amplified     | n.a. | $1.0 < x \leq 1.5$ | yes     | yes | no | yes |
| 23 | n.a.         | n.a.          | n.a. | $0 < x \leq 0.5$   | yes     | no  | no | yes |
| 24 | n.a.         | n.a.          | n.a. | $1.0 < x \leq 1.5$ | yes     | yes | no | yes |
| 25 | methylated   | n.a.          | no   | $0 < x \leq 0.5$   | yes     | yes | no | yes |
| 26 | methylated   | not amplified | yes  | $1.5 < x \leq 2.5$ | yes     | no  | no | yes |
| 27 | unmethylated | n.a.          | yes  | $1.0 < x \leq 1.5$ | yes     | no  | no | yes |
| 28 | unmethylated | n.a.          | n.a. | $1.0 < x \leq 1.5$ | only RT | no  | no | no  |
| 29 | n.a.         | n.a.          | n.a. | $2.5 < x \leq 6.5$ | yes     | yes | no | yes |
| 30 | methylated   | n.a.          | n.a. | $0 < x \leq 0.5$   | yes     | no  | no | no  |
| 31 | n.a.         | n.a.          | n.a. | $1.5 < x \leq 2.5$ | yes     | no  | no | no  |
| 32 | methylated   | n.a.          | n.a. | $2.5 < x \leq 6.5$ | yes     | no  | no | yes |
| 33 | methylated   | not amplified | yes  | $0 < x \leq 0.5$   | yes     | no  | no | no  |
| 34 | methylated   | n.a.          | n.a. | $0 < x \leq 0.5$   | yes     | yes | no | no  |
| 35 | unmethylated | amplified     | yes  | $0 < x \leq 0.5$   | yes     | no  | no | no  |
| 36 | methylated   | not amplified | n.a. | $0.5 < x \leq 1.0$ | yes     | no  | no | no  |
| 37 | n.a.         | n.a.          | no   | $1.0 < x \leq 1.5$ | yes     | yes | no | yes |
| 38 | methylated   | amplified     | yes  | $0 < x \leq 0.5$   | yes     | yes | no | yes |
| 39 | methylated   | not amplified | yes  | $0 < x \leq 0.5$   | yes     | no  | no | no  |
| 40 | methylated   | n.a.          | n.a. | $0 < x \leq 0.5$   | yes     | no  | no | no  |
| 41 | unmethylated | not amplified | yes  | $0 < x \leq 0.5$   | yes     | yes | no | yes |
| 42 | n.a.         | n.a.          | n.a. | $0.5 < x \leq 1.0$ | yes     | no  | no | no  |
| 43 | unmethylated | not amplified | no   | $0 < x \leq 0.5$   | yes     | no  | no | yes |

Abbreviations: EGFR: epidermal growth factor receptor; ICB: immune checkpoint blockade; MGMT: O<sup>6</sup>-methylguanine-DNA methyltransferase; n.a.: not applicable, clinical data not available; PTEN: phosphatase and tensin homolog; RT: radiotherapy; TMZ: temozolomide.

135 **Table S11. Prior bevacizumab treatment does not influence Trp metabolite levels in serum, related to**  
 136 **Figure 3.**

137 Representation of the mean metabolite abundance in the sera of glioblastoma patient groups having received  
 138 prior therapy with bevacizumab or not relative to reference sample depicted as log<sub>2</sub>Ratio. Group  
 139 comparisons were performed using a two-tailed unpaired Student's t test, p values are given as numbers.

| <b>Metabolite</b> | <b>Bevacizumab treatment prior to blood draw (n = 29)</b> | <b>No bevacizumab treatment prior to blood draw (n = 14)</b> | <b>P value</b> |
|-------------------|-----------------------------------------------------------|--------------------------------------------------------------|----------------|
| Trp               | -0.23929                                                  | -0.171806                                                    | 0.541873       |
| OH-Trp            | -0.20438                                                  | -0.147861                                                    | 0.590434       |
| FK                | -0.18088                                                  | -0.128576                                                    | 0.623908       |
| Kyn               | -0.30523                                                  | -0.296833                                                    | 0.943081       |
| AA                | -0.19042                                                  | -0.203277                                                    | 0.861635       |
| OH-Kyn            | 0.54967                                                   | 0.431191                                                     | 0.376339       |
| OH-AA             | -0.21835                                                  | -0.074910                                                    | 0.365114       |

Abbreviations: AA: anthranilic acid; FK: *N*-formylkynurenine; Kyn: kynurenine; OH-AA: hydroxy-anthranilic acid; OH-Kyn: hydroxy-kynurenine; OH-Trp: hydroxy-tryptophan; Trp: tryptophan.

140  
 141 **Table S12. MGMT promotor methylation status does not influence Trp metabolite levels in serum,**  
 142 **related to Figure 3.**

143 Representation of the mean metabolite abundance in the sera of glioblastoma patient groups with a  
 144 methylated or unmethylated MGMT promotor relative to reference sample depicted as log<sub>2</sub>Ratio. Group  
 145 comparisons were performed using a two-tailed unpaired Student's t test, p values are given as numbers.

| <b>Metabolite</b> | <b>methylated MGMT promotor (n = 15)</b> | <b>unmethylated MGMT promotor (n = 14)</b> | <b>P value</b> |
|-------------------|------------------------------------------|--------------------------------------------|----------------|
| Trp               | -0.307804                                | -0.23550                                   | 0.606817       |
| OH-Trp            | -0.290598                                | -0.17417                                   | 0.379436       |
| FK                | -0.244386                                | -0.19412                                   | 0.710315       |
| Kyn               | -0.318028                                | -0.36445                                   | 0.737927       |

|                                                                                                                                                                                                                                                            |           |          |          |
|------------------------------------------------------------------------------------------------------------------------------------------------------------------------------------------------------------------------------------------------------------|-----------|----------|----------|
| AA                                                                                                                                                                                                                                                         | -0.269437 | -0.19970 | 0.408155 |
| OH-Kyn                                                                                                                                                                                                                                                     | 0.552551  | 0.42303  | 0.412657 |
| OH-AA                                                                                                                                                                                                                                                      | -0.165172 | -0.06865 | 0.568299 |
| Abbreviations: AA: anthranilic acid; FK: <i>N</i> -formylkynurenine; Kyn: kynurenine; MGMT: O <sup>6</sup> -methylguanine-DNA methyltransferase; OH-AA: hydroxy-anthranilic acid; OH-Kyn: hydroxy-kynurenine; OH-Trp: hydroxy-tryptophan; Trp: tryptophan. |           |          |          |

146  
147 **Table S13. EGFR amplification status does not influence Trp metabolite levels in serum, related to**  
148 **Figure 3.**  
149 Representation of the mean metabolite abundance in the sera of glioblastoma patient groups with EGFR  
150 amplification or not relative to reference sample depicted as log<sub>2</sub>Ratio. Group comparisons were performed  
151 using a two-tailed unpaired Student's t test, p values are given as numbers.

| Metabolite                                                                                                                                                                                                                              | EGFR amplification<br>( <i>n</i> = 6) | No EGFR<br>amplification<br>( <i>n</i> = 12) | P value  |
|-----------------------------------------------------------------------------------------------------------------------------------------------------------------------------------------------------------------------------------------|---------------------------------------|----------------------------------------------|----------|
| Trp                                                                                                                                                                                                                                     | -0.284102                             | -0.36048                                     | 0.682655 |
| OH-Trp                                                                                                                                                                                                                                  | -0.190309                             | -0.33811                                     | 0.413630 |
| FK                                                                                                                                                                                                                                      | -0.226813                             | -0.31161                                     | 0.635678 |
| Kyn                                                                                                                                                                                                                                     | -0.333124                             | -0.42910                                     | 0.589516 |
| AA                                                                                                                                                                                                                                      | -0.264457                             | -0.30276                                     | 0.730573 |
| OH-Kyn                                                                                                                                                                                                                                  | 0.526196                              | 0.34979                                      | 0.392807 |
| OH-AA                                                                                                                                                                                                                                   | -0.264156                             | -0.17875                                     | 0.709499 |
| Abbreviations: AA: anthranilic acid; EGFR: epidermal growth factor receptor; FK: <i>N</i> -formylkynurenine; Kyn: kynurenine; OH-AA: hydroxy-anthranilic acid; OH-Kyn: hydroxy-kynurenine; OH-Trp: hydroxy-tryptophan; Trp: tryptophan. |                                       |                                              |          |

152  
153 **Table S14. PTEN loss does not influence Trp metabolite levels in serum, related to Figure 3.**  
154 Representation of the mean metabolite abundance in the sera of glioblastoma patient groups with evidence  
155 for PTEN loss or not relative to reference sample depicted as log<sub>2</sub>Ratio. Group comparisons were performed  
156 using a two-tailed unpaired Student's t test, p values are given as numbers.

| <b>Metabolite</b> | <b>Evidence for PTEN loss (<i>n</i> = 11)</b> | <b>No evidence for PTEN loss (<i>n</i> = 6)</b> | <b>P value</b> |
|-------------------|-----------------------------------------------|-------------------------------------------------|----------------|
| Trp               | -0.395536                                     | -0.24675                                        | 0.429786       |
| OH-Trp            | -0.333291                                     | -0.16009                                        | 0.360572       |
| FK                | -0.350850                                     | -0.15310                                        | 0.272037       |
| Kyn               | -0.464462                                     | -0.19459                                        | 0.134742       |
| AA                | -0.300172                                     | -0.21243                                        | 0.447791       |
| OH-Kyn            | 0.440620                                      | 0.64832                                         | 0.248894       |
| OH-AA             | -0.117671                                     | -0.51601                                        | 0.064070       |

Abbreviations: AA: anthranilic acid; FK: *N*-formylkynurenine; Kyn: kynurenine; OH-AA: hydroxy-anthranilic acid; OH-Kyn: hydroxy-kynurenine; OH-Trp: hydroxy-tryptophan; PTEN: phosphatase and tensin homolog; Trp: tryptophan.

158 **Table S15. Reduction of metabolite levels in glioblastoma patient sera, related to Figure 4.**

159 Representation of the log<sub>2</sub> fold change (FC) values of metabolite level reduction in patient versus age- and  
160 sex-matched control sera as depicted in Figure 4B and the corresponding reduction of metabolite levels  
161 given in %.

| <b>Metabolite</b> | <b>Log<sub>2</sub> (FC patients vs controls)</b> | <b>FC (patients vs controls)</b> | <b>Metabolite level reduction in patients vs controls (%)</b> | <b>P value</b> |
|-------------------|--------------------------------------------------|----------------------------------|---------------------------------------------------------------|----------------|
| Trp               | -0.300                                           | 0.812                            | 18.8                                                          | 0.000261358    |
| OH-Trp            | -0.268                                           | 0.830                            | 17.0                                                          | 0.000460516    |
| FK                | -0.273                                           | 0.827                            | 17.3                                                          | 0.000558024    |
| Kyn               | -0.219                                           | 0.859                            | 14.1                                                          | 0.010150130    |
| AA                | -0.164                                           | 0.892                            | 10.8                                                          | 0.007304935    |
| OH-Kyn            | -0.042                                           | 0.971                            | 2.9                                                           | 0.686404933    |
| OH-AA             | -0.007                                           | 0.995                            | 0.5                                                           | 0.952159761    |

Abbreviations: AA: anthranilic acid; FC: fold change; FK: *N*-formylkynurenine; Kyn: kynurenine; OH-AA: hydroxy-anthranilic acid; OH-Kyn: hydroxy-kynurenine; OH-Trp: hydroxy-tryptophan; Trp: tryptophan; vs: versus.

162

163 **Table S16. Characteristics of tumor tissue samples analyzed with MALDI MSI, related to Figure 5**  
 164 **and Figure S3.**

| <b>Patient number</b>                                                                                                                                                                                                                                                                                | <b>Primary glioblastoma</b> | <b>IDH status</b> | <b>MGMT promotor status</b> | <b>EGFR amplification</b> | <b>Evidence for PTEN loss</b> |
|------------------------------------------------------------------------------------------------------------------------------------------------------------------------------------------------------------------------------------------------------------------------------------------------------|-----------------------------|-------------------|-----------------------------|---------------------------|-------------------------------|
| 44                                                                                                                                                                                                                                                                                                   | primary                     | WT                | methylated                  | amplified                 | n.a.                          |
| 45                                                                                                                                                                                                                                                                                                   | primary                     | WT                | methylated                  | not amplified             | n.a.                          |
| 46                                                                                                                                                                                                                                                                                                   | primary                     | WT                | unmethylated                | not amplified             | n.a.                          |
| 47                                                                                                                                                                                                                                                                                                   | primary                     | WT                | unmethylated                | not amplified             | no                            |
| 48                                                                                                                                                                                                                                                                                                   | primary                     | WT                | unmethylated                | amplified                 | no                            |
| 49                                                                                                                                                                                                                                                                                                   | primary                     | WT                | methylated                  | not amplified             | n.a.                          |
| 50                                                                                                                                                                                                                                                                                                   | primary                     | WT                | unmethylated                | not amplified             | no                            |
| 51                                                                                                                                                                                                                                                                                                   | primary                     | WT                | unmethylated                | not amplified             | no                            |
| 52                                                                                                                                                                                                                                                                                                   | primary                     | WT                | methylated                  | amplified                 | n.a.                          |
| 53                                                                                                                                                                                                                                                                                                   | primary                     | WT                | unmethylated                | amplified                 | yes                           |
| 54                                                                                                                                                                                                                                                                                                   | primary                     | WT                | unmethylated                | n.a.                      | yes                           |
| 55                                                                                                                                                                                                                                                                                                   | n.a.                        | WT                | unmethylated                | not amplified             | no                            |
| 56                                                                                                                                                                                                                                                                                                   | primary                     | WT                | methylated                  | not amplified             | no                            |
| 57                                                                                                                                                                                                                                                                                                   | n.a.                        | n.a.              | n.a.                        | n.a.                      | n.a.                          |
| 58                                                                                                                                                                                                                                                                                                   | primary                     | WT                | methylated                  | not amplified             | no                            |
| 59                                                                                                                                                                                                                                                                                                   | primary                     | n.a.              | n.a.                        | not amplified             | n.a.                          |
| 60                                                                                                                                                                                                                                                                                                   | primary                     | WT                | methylated                  | not amplified             | no                            |
| Abbreviations: EGFR: epidermal growth factor receptor; IDH: isocitrate dehydrogenase; MALDI MSI: MALDI mass spectrometry imaging; MGMT: O <sup>6</sup> -methylguanine-DNA methyltransferase; n.a.: not applicable, clinical data not available; PTEN: phosphatase and tensin homolog; WT: wild type. |                             |                   |                             |                           |                               |

165

166 **Table S17. AHR activity associates with worse overall survival in glioblastoma patients, related to**

167 **Figure 6.**

168 Univariate and multivariate cox regression analysis of the effect of AHR activity and age at diagnosis on

169 overall survival in glioblastoma patients in the TCGA database.

| <b>Univariate analysis</b>                                                                                                                                                                   |             |                 |             |                |
|----------------------------------------------------------------------------------------------------------------------------------------------------------------------------------------------|-------------|-----------------|-------------|----------------|
|                                                                                                                                                                                              | <b>Coef</b> | <b>Se.coef.</b> | <b>Z</b>    | <b>P value</b> |
| Age at diagnosis                                                                                                                                                                             | 9.60E-05    | 2.44E-05        | 3.930614673 | 8.47E-05       |
| AHR activity                                                                                                                                                                                 | 0.190344934 | 0.092285956     | 2.06255581  | 0.03915485     |
| <b>Multivariate analysis</b>                                                                                                                                                                 |             |                 |             |                |
|                                                                                                                                                                                              | <b>Coef</b> | <b>Se.coef.</b> | <b>Z</b>    | <b>P value</b> |
| Age at diagnosis                                                                                                                                                                             | 9.75E-05    | 2.49E-05        | 3.912168313 | 9.15E-05       |
| AHR activity                                                                                                                                                                                 | 0.187806232 | 0.092976393     | 2.019934585 | 0.043390173    |
| Abbreviations: AHR: aryl hydrocarbon receptor; Coef: coefficient; Se.coef.: Standard error of the coefficient; Z: Wald test z score, which is the coefficient divided by its standard error. |             |                 |             |                |

170
